# Supplementary material for: Accessibility and quality of drug company disclosures of payments to healthcare professionals and organisations in 37 countries: a European policy review
Source: PubMed Central journal article supplement (PMC8679071; doi:10.1136/bmjopen-2021-053138), 2021-12-16
Supplement: bmjopen-2021-053138supp002.pdf [file bmjopen-2021-053138supp002.pdf]

## Online Supplement 2. Responses to stakeholder survey

## Part 1. Pharmaceutical industry trade groups

| Country                | Name of pharmaceutical industry trade group                                                          | Reply received | Nature of reply         |
|------------------------|------------------------------------------------------------------------------------------------------|----------------|-------------------------|
| AUSTRIA                | Fachverband der Chemischen Industrie Österreichs                                                     | Yes            | Answered all questions  |
| BOSNIA AND HERZEGOVINA | Association of Research-based Medicine Producers in Bosnia & Herzegovina                             | No             | N/A                     |
| BULGARIA               | Association of the Research-based Pharmaceutical Manufacturers in Bulgaria                           | No             | N/A                     |
| CROATIA                | iFI – Inovativna farmaceutska inicijativa                                                            | No             | N/A                     |
| CYPRUS                 | The Cyprus Association of Research and Development Pharmaceutical Companies                          | No             | N/A                     |
| CZECH REPUBLIC         | Asociace inovativního farmaceutického průmyslu                                                       | Yes            | Answered some questions |
| DENMARK                | LægemiddelindustriforeningenLersø                                                                    | Yes            | Answered some questions |
| ESTONIA                | The Association of Pharmaceutical Manufacturers in Estonia                                           | No             | N/A                     |
| FINLAND                | Lääketeollisuus                                                                                      | Yes            | Answered all questions  |
| GERMANY                | Freiwillige Selbstkontrolle für die Arzneimittelindustrie                                            | No             | N/A                     |
| GREECE                 | Hellenic Association of Pharmaceutical Companies                                                     | No             | N/A                     |
| HUNGARY                | Association of Innovative Pharmaceutical Manufacturers                                               | No             | N/A                     |
| ICELAND                | Icelandic Association of the Pharmaceutical Industry                                                 | Yes            | Holding message         |
| IRELAND                | Irish Pharmaceutical Healthcare Association                                                          | Yes            | Answered all questions  |
| ITALY                  | Associazione delle imprese del farmaco<br>Association of International<br>Innovative Pharmaceuticals | No             | N/A                     |
| LATVIA                 | Producers                                                                                            | Yes            | Answered some questions |
| LITHUANIA              | Innovative Pharmaceutical Industry Association                                                       | Yes            | Answered all questions  |
| LUXEMBOURG             | Association pharmaceutique luxembourgeoise                                                           | Yes            | Answered all questions  |
| NORTH MACEDONIA        | Association of Foreign Innovative Manufacturers in Macedonia                                         | Yes            | Answered all questions  |
| NORWAY                 | Legemiddelindustrien                                                                                 | Yes            | Answered all questions  |
| POLAND                 | Związek Pracodawców Innowacyjnych Firm Farmaceutycznych                                              | Yes            | Holding message         |

|             |                                                                               |     |                         |
|-------------|-------------------------------------------------------------------------------|-----|-------------------------|
| PORTUGAL    | Associação Portuguesa da Indústria Farmacêutica                               | No  | N/A                     |
| ROMANIA     | Association of International Medicines Manufacturers                          | No  | N/A                     |
| RUSSIA      | Association of International Pharmaceutical Manufacturers                     | No  | N/A                     |
| SERBIA      | Innovative Drug Manufacturers' Association                                    | No  | N/A                     |
| SLOVAKIA    | Association of the Innovative Pharmaceutical Industry                         | No  | N/A                     |
| SLOVENIA    | Forum of International Research and Development Pharmaceutical Companies, EIG | No  | N/A                     |
| SPAIN       | Asociación Nacional Empresarial de la Industria Farmacéutica                  | Yes | Answered some questions |
| SWEDEN      | Läkemedelsindustriföreningen                                                  | Yes | Answered all questions  |
| SWITZERLAND | Science Industries Switzerland                                                | Yes | Holding message         |
| TURKEY      | Araştırmacı İlaç Firmaları Derneği                                            | Yes | Answered all questions  |
| UK          | Association of the British Pharmaceutical Industry                            | Yes | Answered all questions  |
| UKRAINE     | Association of Pharmaceutical Research and Development                        | No  | N/A                     |
| EUROPE      | EFPIA                                                                         | No  | N/A                     |

## Part 2. Public and multistakeholder bodies overseeing payment disclosure

| Country         | Name of public or multistakeholder body overseeing payment disclosure | Nature of authority overseeing payment disclosure | Reply received | Nature of reply         |
|-----------------|-----------------------------------------------------------------------|---------------------------------------------------|----------------|-------------------------|
| BELGIUM         | betransparent.be                                                      | Multistakeholder body                             | No             | N/A                     |
| DENMARK         | Danish Medicines Agency                                               | Public body                                       | Yes            | Answered some questions |
| ESTONIA         | State Agency of Medicines                                             | Public body                                       | No             | N/A                     |
| FRANCE          | Ministry of Health                                                    | Public body                                       | Yes            | Holding message         |
| GREECE          | National Organisation for Medicines                                   | Public body                                       | No             | N/A                     |
| HUNGARY         | National Institute of Pharmacy and Nutrition                          | Public body                                       | Yes            | Answered all questions  |
| LATVIA          | Latvian Health Inspectorate                                           | Public body                                       | Yes            | Answered all questions  |
| LITHUANIA       | Lithuanian State Medicines Control Agency                             | Public body                                       | Yes            | Answered all questions  |
| THE NETHERLANDS | Vereniging Innovatieve Geneesmiddelen                                 | Multistakeholder body                             | Yes            | Inquiry redirected      |
| PORTUGAL        | INFARMED - National Authority of Medicines and Health Products        | Public body                                       | Yes            | Answered some questions |
| ROMANIA         | National Agency for Medicines and Medical Devices in Romania          | Public body                                       | Yes            | Holding message         |
| SLOVAKIA        | National Health Information Center                                    | Public body                                       | Yes            | Answered some questions |
| TURKEY          | Turkish Medicines and Medical Devices Agency                          | Public body                                       | Yes            | Holding message         |
