# Supplementary material for: Accessibility and quality of drug company disclosures of payments to healthcare professionals and organisations in 37 countries: a European policy review
Source: PubMed Central journal article supplement (PMC8679071; doi:10.1136/bmjopen-2021-053138), 2021-12-16
Supplement: bmjopen-2021-053138supp003.pdf [file bmjopen-2021-053138supp003.pdf]

Online Supplement 3. Examples of deviations of data reporting formats from the EFPIA standard “disclosure template”

Part 1: EFPIA “disclosure template”

**ANNEX A (binding)**  
**Standardised disclosure template**

| ANNEX A - STANDARDISED DISCLOSURE TEMPLATE                                                                                                                                                                                                                       |                                                                                                                   |                                                                                            |                                                              |                                                       |                                                               |                                              |                                                                                       |                       |                        |                                                                               | Date of publication: .....                                                                                                        |                |
|------------------------------------------------------------------------------------------------------------------------------------------------------------------------------------------------------------------------------------------------------------------|-------------------------------------------------------------------------------------------------------------------|--------------------------------------------------------------------------------------------|--------------------------------------------------------------|-------------------------------------------------------|---------------------------------------------------------------|----------------------------------------------|---------------------------------------------------------------------------------------|-----------------------|------------------------|-------------------------------------------------------------------------------|-----------------------------------------------------------------------------------------------------------------------------------|----------------|
|                                                                                                                                                                                                                                                                  | Full Name<br><small>(Art. 1.01)</small>                                                                           | HCPs: City of Principal Practice<br>HCOs: city where registered<br><small>(Art. 3)</small> | Country of Principal Practice<br><small>(Schedule 1)</small> | Principal Practice Address<br><small>(Art. 3)</small> | Unique country identifier OPTIONAL<br><small>(Art. 3)</small> | Donations and Grants to HCOs (Art. 3.01.1.a) | Contribution to costs of Events <small>(Art. 3.01.1.b &amp; 3.01.2.a)</small>         |                       |                        | Fee for service and consultancy <small>(Art. 3.01.1.c &amp; 3.01.2.a)</small> |                                                                                                                                   | TOTAL OPTIONAL |
|                                                                                                                                                                                                                                                                  |                                                                                                                   |                                                                                            |                                                              |                                                       |                                                               |                                              | Sponsorship agreements with HCOs / third parties appointed by HCOs to manage an Event | Registration Fees     | Travel & Accommodation | Fees                                                                          | Related expenses agreed in the fee for service or consultancy contract, including travel & accommodation relevant to the contract |                |
| <b>INDIVIDUAL NAMED DISCLOSURE - one line per HCP (i.e. all transfers of value during a year for an individual HCP will be summed up; itemization should be available for the individual Recipient or public authorities' consultation only, as appropriate)</b> |                                                                                                                   |                                                                                            |                                                              |                                                       |                                                               |                                              |                                                                                       |                       |                        |                                                                               |                                                                                                                                   |                |
| HCPs                                                                                                                                                                                                                                                             | Dr A                                                                                                              |                                                                                            |                                                              |                                                       |                                                               | N/A                                          | N/A                                                                                   | Yearly amount         | Yearly amount          | Yearly amount                                                                 | Yearly amount                                                                                                                     |                |
|                                                                                                                                                                                                                                                                  | Dr B                                                                                                              |                                                                                            |                                                              |                                                       |                                                               | N/A                                          | N/A                                                                                   | Yearly amount         | Yearly amount          | Yearly amount                                                                 | Yearly amount                                                                                                                     |                |
|                                                                                                                                                                                                                                                                  | etc.                                                                                                              |                                                                                            |                                                              |                                                       |                                                               | N/A                                          | N/A                                                                                   | Yearly amount         | Yearly amount          | Yearly amount                                                                 | Yearly amount                                                                                                                     |                |
|                                                                                                                                                                                                                                                                  | <b>OTHER, NOT INCLUDED ABOVE - where information cannot be disclosed on an individual basis for legal reasons</b> |                                                                                            |                                                              |                                                       |                                                               |                                              |                                                                                       |                       |                        |                                                                               |                                                                                                                                   |                |
| Aggregate amount attributable to transfers of value to such Recipients - Art. 3.02                                                                                                                                                                               |                                                                                                                   |                                                                                            |                                                              |                                                       |                                                               | N/A                                          | N/A                                                                                   | Aggregate HCPs number | Aggregate HCPs number  | Aggregate HCPs number                                                         | Aggregate HCPs number                                                                                                             | Optional       |
| Number of Recipients in aggregate disclosure - Art. 3.02                                                                                                                                                                                                         |                                                                                                                   |                                                                                            |                                                              |                                                       |                                                               | N/A                                          | N/A                                                                                   |                       |                        |                                                                               |                                                                                                                                   | Optional       |
| % of the number of Recipients included in the aggregate disclosure in the total number, by category, of Recipients disclosed - Art. 3.02                                                                                                                         |                                                                                                                   |                                                                                            |                                                              |                                                       |                                                               | N/A                                          | N/A                                                                                   | %                     | %                      | %                                                                             | %                                                                                                                                 | N/A            |
| <b>INDIVIDUAL NAMED DISCLOSURE - one line per HCO (i.e. all transfers of value during a year for an individual HCO will be summed up; itemization should be available for the individual Recipient or public authorities' consultation only, as appropriate)</b> |                                                                                                                   |                                                                                            |                                                              |                                                       |                                                               |                                              |                                                                                       |                       |                        |                                                                               |                                                                                                                                   |                |
| HCOs                                                                                                                                                                                                                                                             | HCO 1                                                                                                             |                                                                                            |                                                              |                                                       |                                                               | Yearly amount                                | Yearly amount                                                                         | Yearly amount         | Yearly amount          | Yearly amount                                                                 | Yearly amount                                                                                                                     | Optional       |
|                                                                                                                                                                                                                                                                  | HCO 2                                                                                                             |                                                                                            |                                                              |                                                       |                                                               | Yearly amount                                | Yearly amount                                                                         | Yearly amount         | Yearly amount          | Yearly amount                                                                 | Yearly amount                                                                                                                     | Optional       |
|                                                                                                                                                                                                                                                                  | etc.                                                                                                              |                                                                                            |                                                              |                                                       |                                                               | Yearly amount                                | Yearly amount                                                                         | Yearly amount         | Yearly amount          | Yearly amount                                                                 | Yearly amount                                                                                                                     | Optional       |
|                                                                                                                                                                                                                                                                  | <b>OTHER, NOT INCLUDED ABOVE - where information cannot be disclosed on an individual basis for legal reasons</b> |                                                                                            |                                                              |                                                       |                                                               |                                              |                                                                                       |                       |                        |                                                                               |                                                                                                                                   |                |
| Aggregate amount attributable to transfers of value to such Recipients - Art. 3.02                                                                                                                                                                               |                                                                                                                   |                                                                                            |                                                              |                                                       |                                                               | Aggregate HCOs number                        | Aggregate HCOs number                                                                 | Aggregate HCOs number | Aggregate HCOs number  | Aggregate HCOs number                                                         | Aggregate HCOs number                                                                                                             | Optional       |
| Number of Recipients in aggregate disclosure - Art. 3.02                                                                                                                                                                                                         |                                                                                                                   |                                                                                            |                                                              |                                                       |                                                               |                                              |                                                                                       |                       |                        |                                                                               |                                                                                                                                   | Optional       |
| % of the number of Recipients included in the aggregate disclosure in the total number, by category, of Recipients disclosed - Art. 3.02                                                                                                                         |                                                                                                                   |                                                                                            |                                                              |                                                       |                                                               | %                                            | %                                                                                     | %                     | %                      | %                                                                             | %                                                                                                                                 | N/A            |
| <b>AGGREGATE DISCLOSURE</b>                                                                                                                                                                                                                                      |                                                                                                                   |                                                                                            |                                                              |                                                       |                                                               |                                              |                                                                                       |                       |                        |                                                                               |                                                                                                                                   |                |
| R&D                                                                                                                                                                                                                                                              | Transfers of Value re Research & Development as defined - Article 3.04 and Schedule 1                             |                                                                                            |                                                              |                                                       |                                                               |                                              |                                                                                       |                       |                        |                                                                               | TOTAL AMOUNT                                                                                                                      | OPTIONAL       |

latest update: 27 June 2019

**Note**

The screenshot was taken from version the EFPIA Code which was in force the time of writing.<sup>1</sup>



**References**

1. EFPIA. EFPIA Code of practice 2019 [Available from: [https://www.efpia.eu/media/554677/efpia\\_codes\\_a5\\_v3-2021\\_sm.pdf](https://www.efpia.eu/media/554677/efpia_codes_a5_v3-2021_sm.pdf)].
2. Eurosfordocs.eu. Tech documentation, 2021 [Available from: [eurosfordocs.eu/on-the-tech-side/tech-documentation/](https://eurosfordocs.eu/on-the-tech-side/tech-documentation/) accessed 4th January 2021].
