# Supplementary material for: Accessibility and quality of drug company disclosures of payments to healthcare professionals and organisations in 37 countries: a European policy review
Source: PubMed Central journal article supplement (PMC8679071; doi:10.1136/bmjopen-2021-053138), 2021-12-16
Supplement: bmjopen-2021-053138supp005.pdf [file bmjopen-2021-053138supp005.pdf]

Online supplement 5. Eurosfordocs.eu – database summary (2017-2019)<sup>1</sup>

| Country     | Disclosure reports | Successfully extracted (parsed) disclosure reports | Parse ratio | Companies associated with parsed disclosure reports | Number of payments to healthcare professionals and organisations | Value of payments (€) <sup>2</sup> |
|-------------|--------------------|----------------------------------------------------|-------------|-----------------------------------------------------|------------------------------------------------------------------|------------------------------------|
| UK          | 1 <sup>3</sup>     | 1                                                  | 100%        | 141                                                 | 164,112                                                          | 1,771,785,871                      |
| Germany     | 112                | 89                                                 | 79%         | 32                                                  | 103,477                                                          | 1,524,231,568                      |
| Spain       | 60                 | 48                                                 | 80%         | 16                                                  | 370,444                                                          | 959,704,223                        |
| Italy       | 60                 | 57                                                 | 95%         | 19                                                  | 143,244                                                          | 954,063,974                        |
| Switzerland | 138                | 117                                                | 85%         | 41                                                  | 36,503                                                           | 471,638,889                        |
| Sweden      | 184                | 168                                                | 91%         | 68                                                  | 15,434                                                           | 249,913,018                        |
| Ireland     | 1 <sup>3</sup>     | 1                                                  | 100%        | 46                                                  | 18,312                                                           | 97,259,959                         |
| Total       | 556                | 481                                                |             | 160                                                 | 851,526                                                          | 6,028,597,501                      |

**Notes.**

<sup>1</sup> – All data is accurate as of January 2021. Eurosfordocs.eu is updated regularly to reflect occasional changes in disclosure reports published by drug companies.

<sup>2</sup> – All payment values in non-euro currencies were converted to euros based the exchange rate obtained from the CurrencyConverter <sup>1</sup> a Python library for exchange rates.

<sup>3</sup> – The UK and Ireland are the only countries reported in the table in which all drug company payments are included in a single database. In all other countries, disclosure reports are published on individual websites for each company.

**References**

1. CurrencyConverter. CurrencyConverter 0.14.4 2020 [Available from: <https://pypi.org/project/CurrencyConverter/> accessed 19th January 2021.
